# Supplementary material for: Synthesis and crystal structures of unsymmetrical wave-shaped heptathienoacenes
Source: Royal Society of Chemistry journal article supplement (doi:10.1039/d2ob00800a), 2022-01-01
Supplement: d2ob00800a1.pdf [file d2ob00800a1.pdf]

Supporting information for

## **Synthesis and Crystal Structures of Unsymmetrical Wave-shaped Heptathienoacenes**

Zhiping Wu<sup>§</sup>, Wan Xu<sup>§</sup>, Chunli Li, Zhiying Ma, Guangxia Wang\* and Hua Wang\*

Engineering Research Center for Nanomaterials, Henan University, Kaifeng, 475004, China

E-mail address: wangguangxia@henu.edu.cn and hwang@henu.edu.cn

### **Table of contents**

|                                                                                            |     |
|--------------------------------------------------------------------------------------------|-----|
| <b><sup>1</sup>H NMR, <sup>13</sup>C NMR and HRMS Spectra/ Data of new compounds</b> ..... | S2  |
| 1. NMR and HRMS Spectra/ Data of <b>2</b> .....                                            | S2  |
| 2. NMR and HRMS Spectra/ Data of <b>4</b> .....                                            | S3  |
| 3. NMR and HRMS Spectra/ Data of <b>7</b> .....                                            | S5  |
| 4. NMR and HRMS Spectra/ Data of <b>8</b> .....                                            | S6  |
| 5. NMR and HRMS Spectra of <b>10</b> .....                                                 | S8  |
| 6. NMR and HRMS Spectra/ Data of <b>11</b> .....                                           | S9  |
| 7. NMR and HRMS Spectra of <b>UHT-1</b> .....                                              | S11 |
| 8. NMR and HRMS Spectra of <b>UHT-2</b> .....                                              | S12 |
| 9. NMR and HRMS Spectra of <b>UHT-3</b> .....                                              | S14 |
| <b>X-ray crystallographic data of UHT-1, UHT-2 and UHT-3</b> .....                         | S16 |
| <b>Optimized structures information for UHT-1, UHT-2 and UHT-3</b> .....                   | S17 |

# $^1\text{H}$ NMR, $^{13}\text{C}$ NMR and HRMS Spectra/ Data of new compounds

## 1. NMR and HRMS Spectra/ Data of **2**

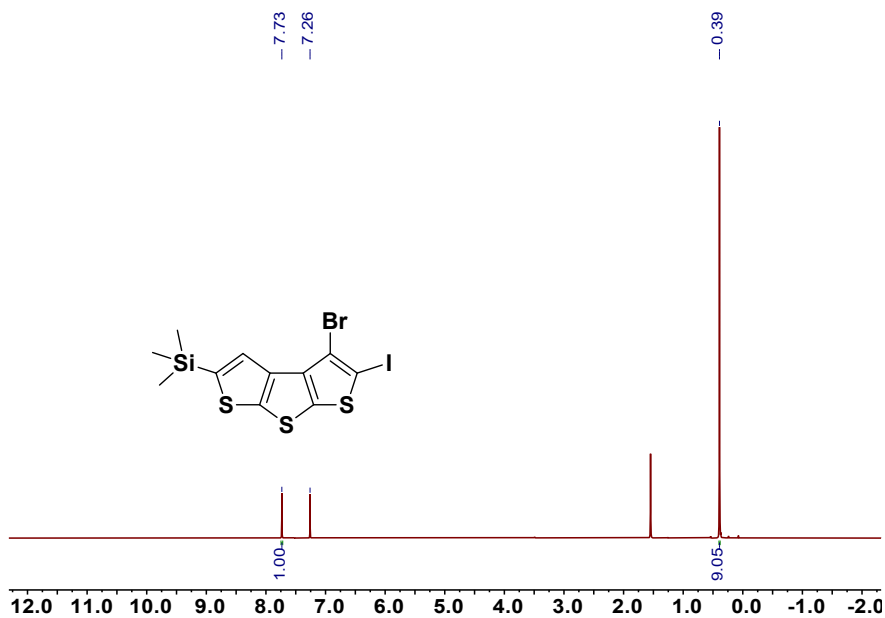

Figure S1.  $^1\text{H}$  NMR (400 MHz,  $\text{CDCl}_3$ ) spectrum of **2**

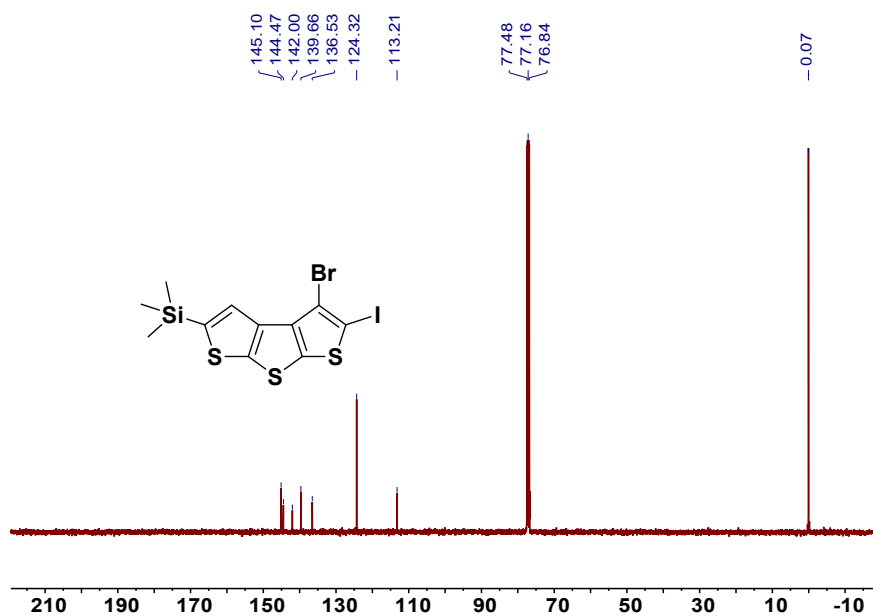

Figure S2.  $^{13}\text{C}$  NMR (100 MHz,  $\text{CDCl}_3$ ) spectrum of **2**

Instrument: Agilent 7200 GC QTOF MS

Sample Serial Number: Zwj-1-132-w-s

Operator: Zhang, Fang

Date: 2016/05/31

Operation Mode: EI-Positive

Single Mass Analysis

Tolerance = 5.0 ppm / DBE: min = 0, max = 50.0

C: 0-50; H: 0-120; S: 0-10; Si: 0-3; [79Br]: 0-3; I: 0-3

| Formula (M)    | m/z      | m/z (Calc) | Diff (ppm) | DBE |
|----------------|----------|------------|------------|-----|
| C11H10BrISi3S3 | 471.7952 | 471.7935   | 3.29       | 7   |
| C13H9S7Si3     | 471.7952 | 471.7973   | 4.51       | 13  |
| C14H11Br3Si2   | 471.7952 | 471.7944   | -1.71      | 10  |
| C15H7Br2I      | 471.7952 | 471.7954   | 0.36       | 11  |
| C16H4S6Si3     | 471.7952 | 471.794    | -2.64      | 18  |
| C20HBrS3Si2    | 471.7952 | 471.7957   | 1.02       | 22  |
| C7H18Br2S4Si3  | 471.7952 | 471.795    | 1.78       | 1   |
| C3H14BrISi4    | 471.7952 | 471.797    | 3.85       | 2   |

Figure S3. HRMS(EI) data of **2**

## 2. NMR and HRMS Spectra/ Data of **4**

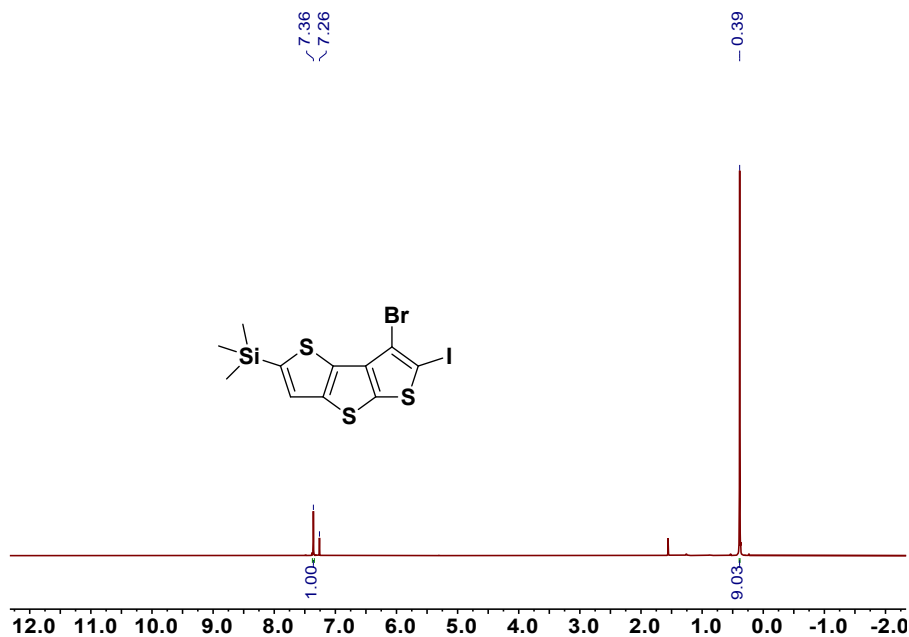

Figure S4. <sup>1</sup>H NMR (400 MHz, CDCl<sub>3</sub>) spectrum of **4**

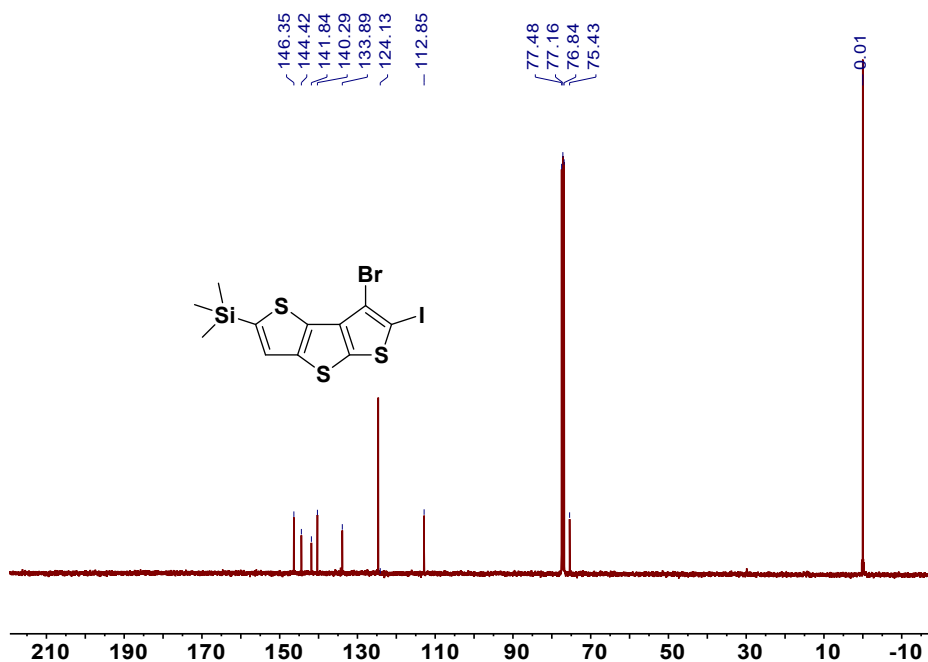

Figure S5. <sup>13</sup>C NMR (100 MHz, CDCl<sub>3</sub>) spectrum of 4

National Center for Organic Mass Spectrometry in Shanghai  
 Shanghai Institute of Organic Chemistry  
 Chinese Academic of Sciences  
 High Resolution MS DATA REPORT

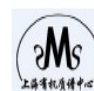

Instrument: Waters Micromass GCT Premier

Sample Serial Number: Zwj-1-178

Operator: Li, Guangping

Date: 2016/12/29

Operation Mode: EI-Positive

Single Mass Analysis

Tolerance = 2.0 mDa / DBE: min = -1.5, max = 50.0

C: 0-60; H: 0-80; Br: 0-2; I: 0-2; S: 0-3; Si: 0-3

| Mass     | Calc. Mass | Diff (ppm) | DBE  | Formula        |
|----------|------------|------------|------|----------------|
| 471.7944 | 471.7942   | 0.4        | 7.0  | C11H10SiS3BrI  |
| 471.7944 | 471.7932   | 2.5        | 6.0  | C10H14Si3S3Br2 |
| 471.7944 | 471.7959   | -3.2       | 11.0 | C15H7Br2I      |
| 471.7944 | 471.7962   | -3.8       | 22.0 | C20H5i2S3Br    |

Figure S6. HRMS(EI) data of 4

### 3. NMR and HRMS Spectra/ Data of 7

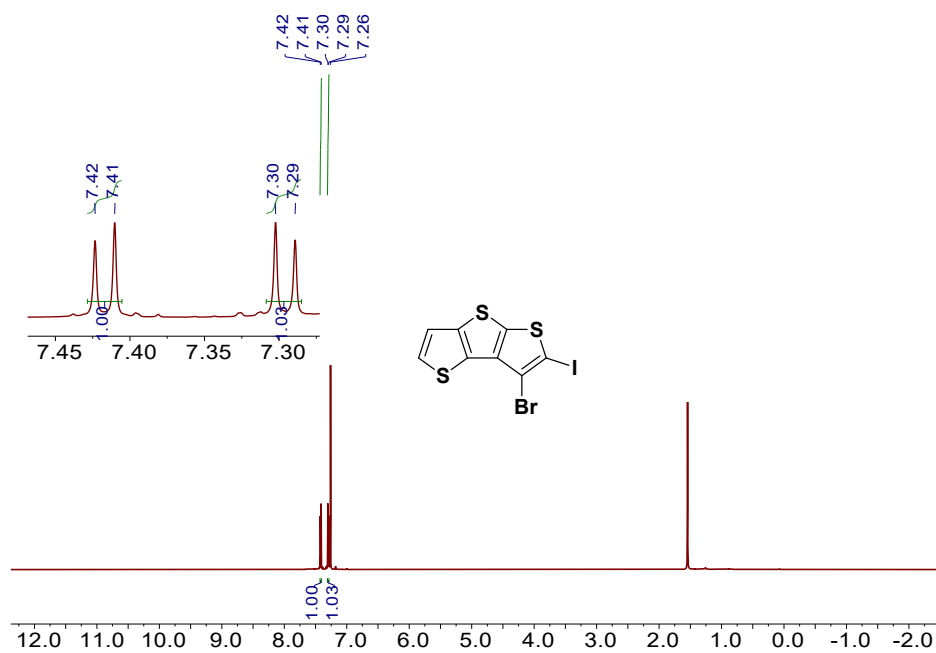

Figure S7.  $^1\text{H}$  NMR (400 MHz,  $\text{CDCl}_3$ ) spectrum of 7

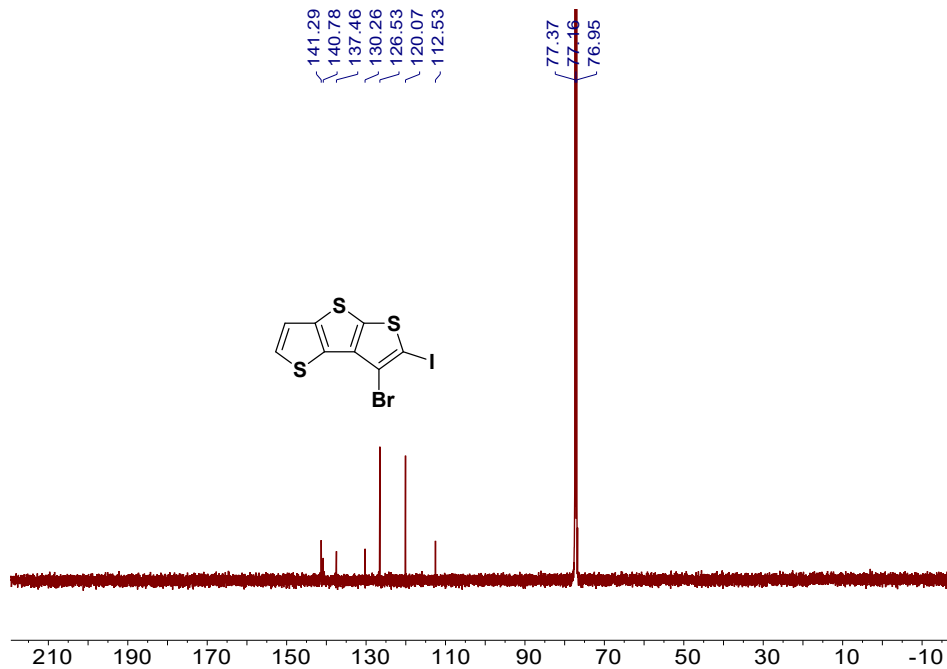

Figure S8.  $^{13}\text{C}$  NMR (150 MHz,  $\text{CDCl}_3$ ) spectrum of 7

Instrument: Thermo Fisher Scientific LTQ FTICR-MS

Card Serial Number: W181553

Sample Serial Number: WZP-3-16-col

Operator: Songw Date: 2018/11/01

Operation Mode: DART Positive Ion Mode

Elemental composition search on mass 399.75

m/z = 394.75-404.75

| m/z      | Theo. Mass | Delta (ppm) | RDB equiv. | Composition                                                    |
|----------|------------|-------------|------------|----------------------------------------------------------------|
| 399.7541 | 399.7541   | 0.05        | 7.0        | C <sub>8</sub> H <sub>2</sub> BrIS <sub>3</sub>                |
|          | 399.7553   | -2.85       | 3.5        | C <sub>2</sub> O <sub>4</sub> N <sub>3</sub> BrIS <sub>2</sub> |

Figure S9. HRMS(DART) data of **7**

#### 4. NMR and HRMS Spectra/ Data of **8**

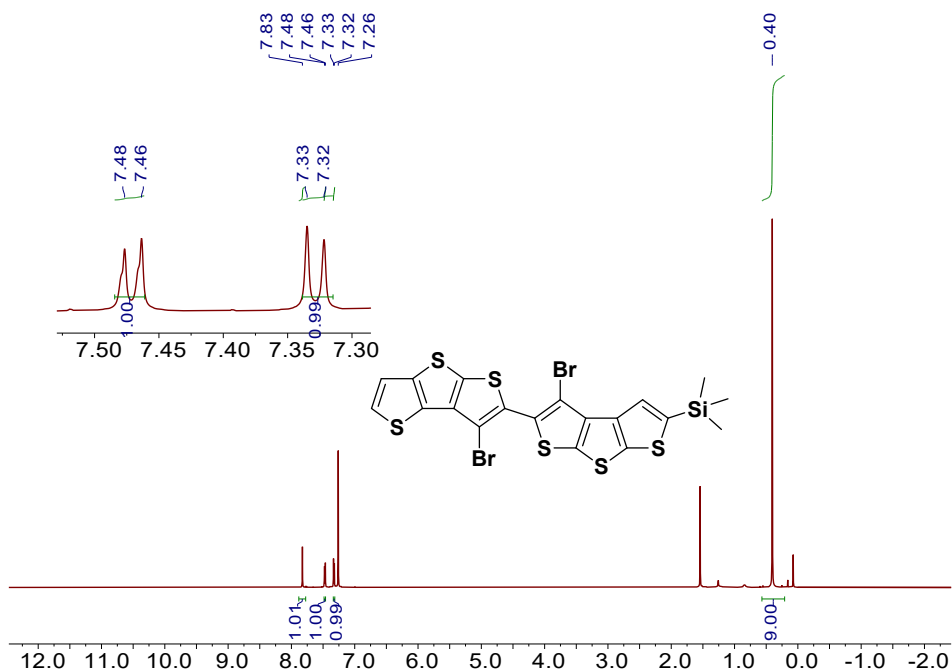

Figure S10. <sup>1</sup>H NMR (400 MHz, CDCl<sub>3</sub>) spectrum of **8**

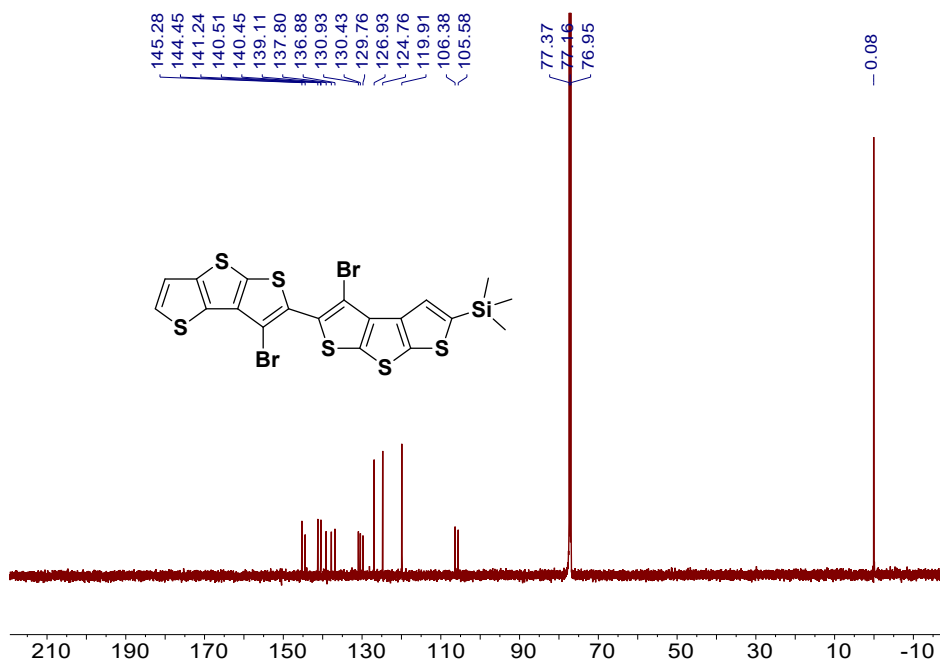

Figure S11.  $^{13}\text{C}$  NMR (150 MHz,  $\text{CDCl}_3$ ) spectrum of **8**

National Center for Organic Mass Spectrometry in Shanghai<sup>↵</sup>  
 Shanghai Institute of Organic Chemistry<sup>↵</sup>  
 Chinese Academy of Sciences<sup>↵</sup>  
 High Resolution MS DATA REPORT<sup>↵</sup>

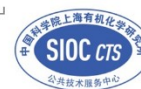

↵  
 Instrument: Thermo Fisher Scientific LTQ FTICR-MS ↵  
 ↵  
 Card Serial Number: W181554<sup>↵</sup>  
 Sample Serial Number: WZP-3-19-col<sup>↵</sup>  
 Operator: Songw      Date: 2018/11/01<sup>↵</sup>  
 Operation Mode: DART Positive Ion Mode<sup>↵</sup>  
 ↵  
 Elemental composition search on mass 617.74

m/z= 612.74-622.74

| m/z      | Theo. Mass | Delta (ppm) | RDB equiv. | Composition                                                           |
|----------|------------|-------------|------------|-----------------------------------------------------------------------|
| 617.7393 | 617.7394   | -0.17       | 14.0       | $\text{C}_{19}\text{H}_{12}\text{Br}_2\text{S}_6\text{Si}$            |
|          | 617.7399   | -1.02       | 7.5        | $\text{C}_{15}\text{H}_{16}\text{O}_2\text{NBr}_4\text{S}_5\text{Si}$ |
|          | 617.7384   | 1.39        | 3.5        | $\text{C}_{12}\text{H}_{19}\text{ONBr}_3\text{S}_5\text{Si}$          |
|          | 617.7381   | 1.91        | 2.0        | $\text{C}_{13}\text{H}_{22}\text{Br}_4\text{S}_3\text{Si}$            |
|          | 617.7365   | 4.43        | 12.5       | $\text{C}_{18}\text{H}_{12}\text{O}_2\text{NBr}_4\text{Si}$           |

Figure S12. HRMS(DART) data of **8**

## 5. NMR and HRMS Spectra of **10**

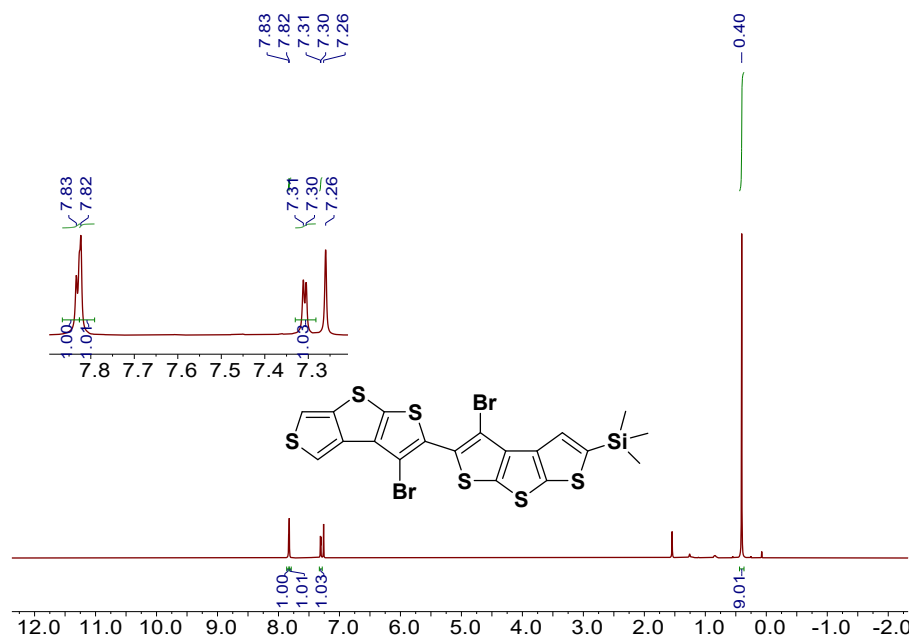

Figure S13. <sup>1</sup>H NMR (400 MHz, CDCl<sub>3</sub>) spectrum of **10**

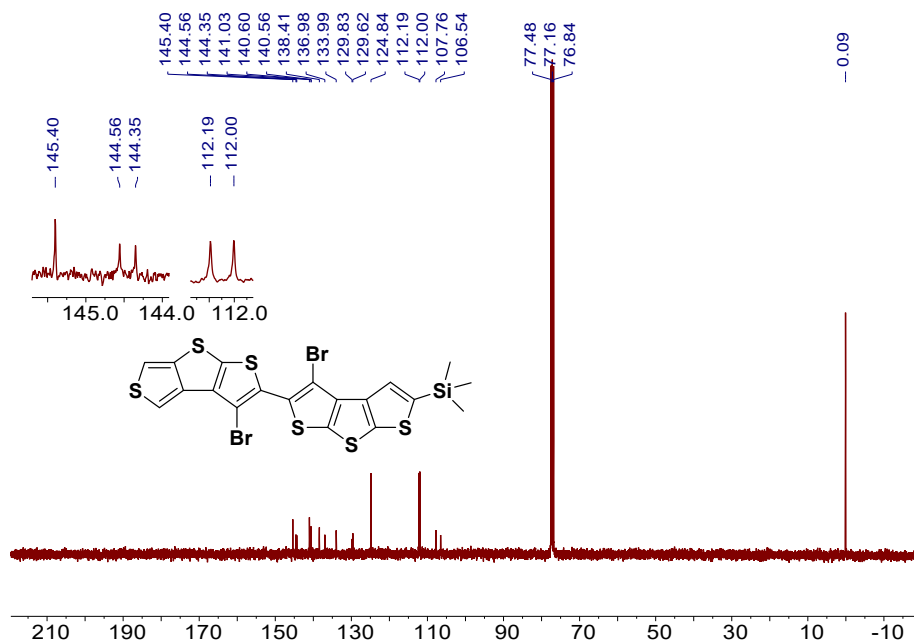

Figure S14. <sup>13</sup>C NMR (100 MHz, 323K, CDCl<sub>3</sub>) spectrum of **10**



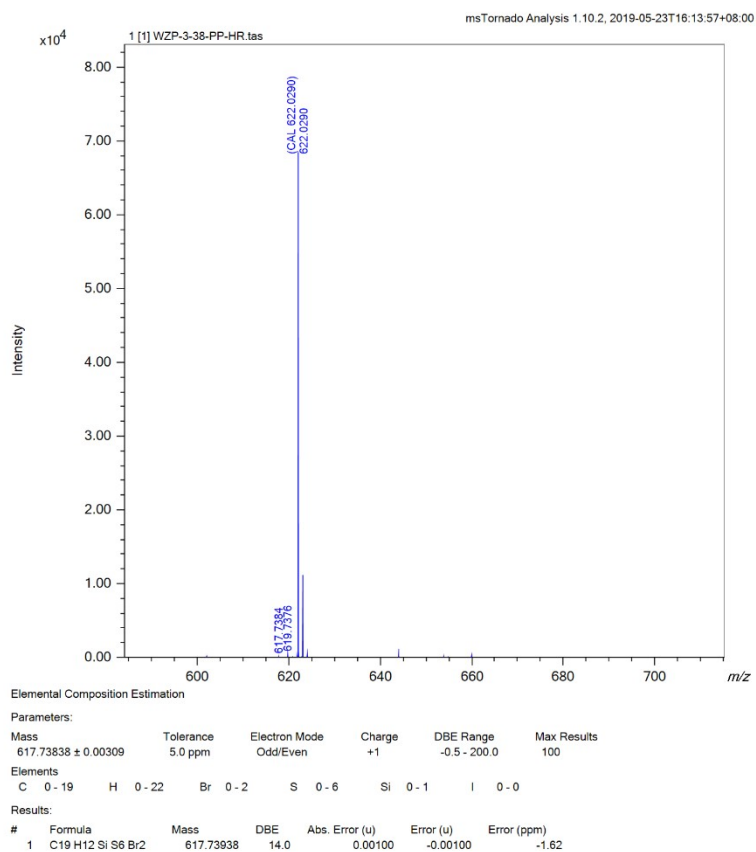

Figure S15. HRMS(MALDI) spectrum of **10**

## 6. NMR and HRMS Spectra/ Data of **11**

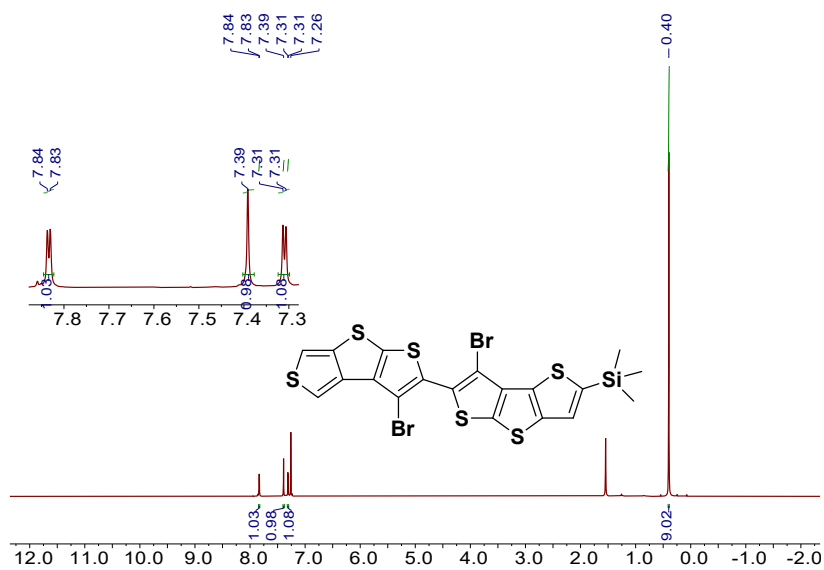

Figure S16. <sup>1</sup>H NMR (400 MHz, CDCl<sub>3</sub>) spectrum of **11**

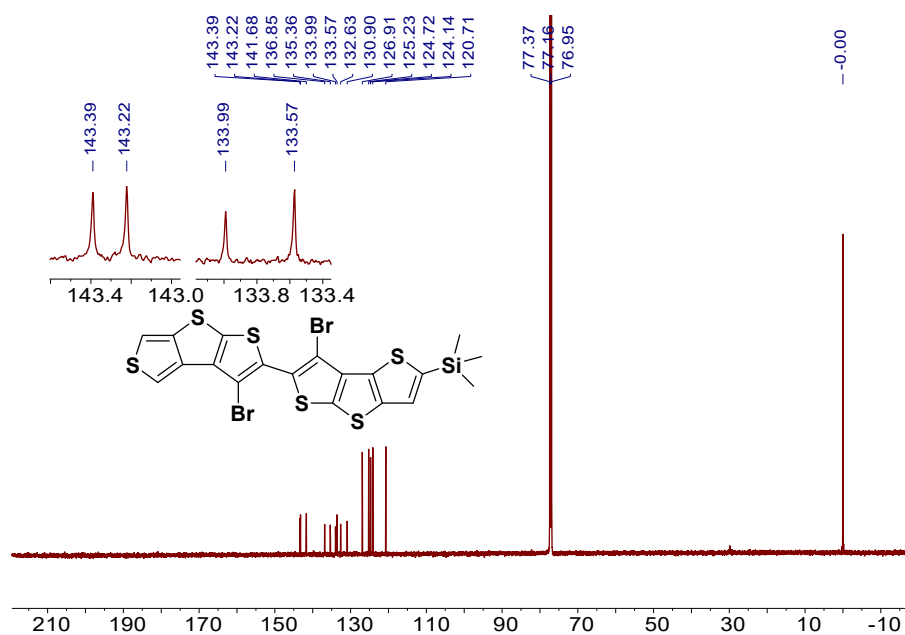

Figure S17. <sup>13</sup>C NMR (150 MHz, CDCl<sub>3</sub>) spectrum of **11**

National Center for Organic Mass Spectrometry in Shanghai  
 Shanghai Institute of Organic Chemistry  
 Chinese Academic of Sciences  
 High Resolution MS DATA REPORT

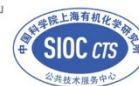

Instrument: Thermo Fisher Scientific LTQ FTICR-MS

Card Serial Number: W18019

Sample Serial Number: WZP-3-49-PTLC-2-2

Operator: Songw Date: 2018/12/26

Operation Mode: DART Positive Ion Mode

Elemental composition search on mass 618.75

m/z = 613.75-623.75

| m/z      | Theo. Mass | Delta (ppm) | RDB equiv. | Composition                                                                                     |
|----------|------------|-------------|------------|-------------------------------------------------------------------------------------------------|
| 618.7469 | 618.7472   | -0.42       | 13.5       | C <sub>19</sub> H <sub>13</sub> Br <sub>2</sub> S <sub>6</sub> Si                               |
|          | 618.7463   | 0.98        | 14.5       | C <sub>18</sub> H <sub>9</sub> O <sub>5</sub> Br <sub>2</sub> S <sub>4</sub> Si                 |
|          | 618.7484   | -2.30       | 10.0       | C <sub>13</sub> H <sub>11</sub> O <sub>4</sub> N <sub>3</sub> Br <sub>2</sub> S <sub>5</sub> Si |
|          | 618.7450   | 3.15        | 15.0       | C <sub>16</sub> H <sub>7</sub> O <sub>4</sub> N <sub>3</sub> Br <sub>2</sub> S <sub>4</sub> Si  |
|          | 618.7497   | -4.47       | 9.5        | C <sub>15</sub> H <sub>13</sub> O <sub>5</sub> Br <sub>2</sub> S <sub>5</sub> Si                |

Figure S18. HRMS(DART) data of **11**

## 7. NMR and HRMS Spectra of UHT-1

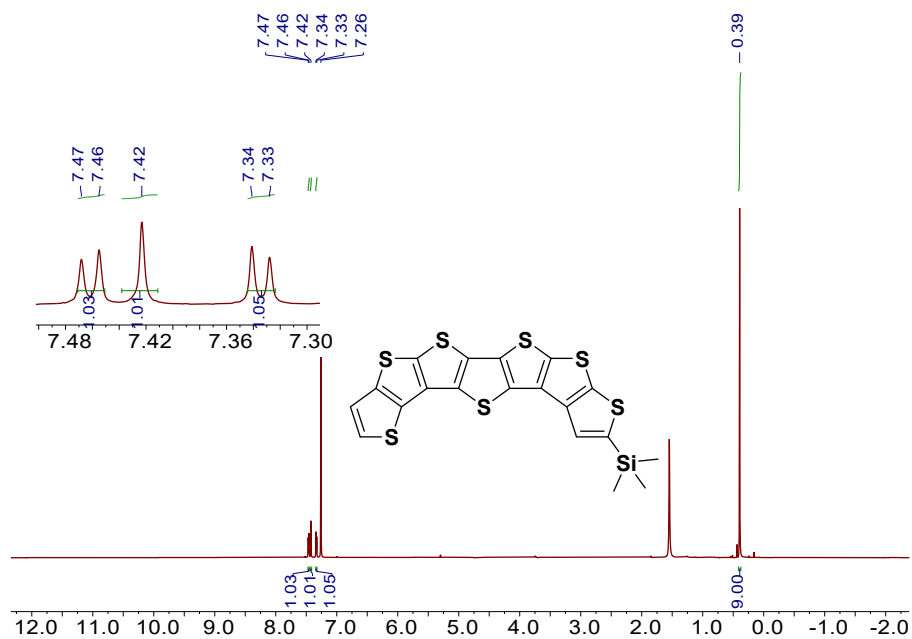

Figure S19. <sup>1</sup>H NMR (400 MHz, CDCl<sub>3</sub>) spectrum of UHT-1

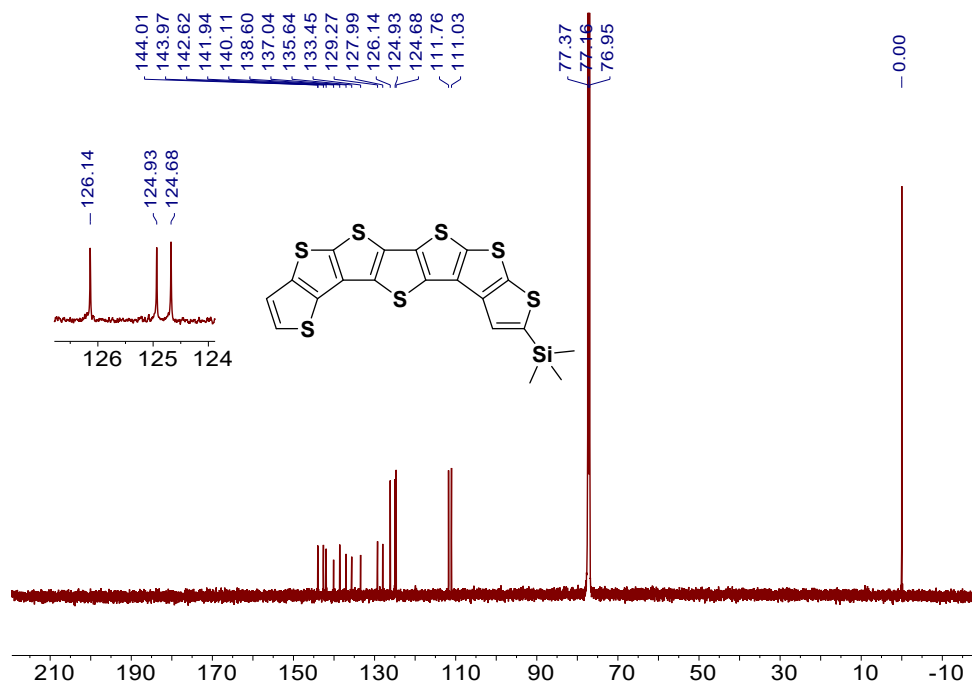

Figure S20. <sup>13</sup>C NMR (150 MHz, CDCl<sub>3</sub>) spectrum of UHT-1

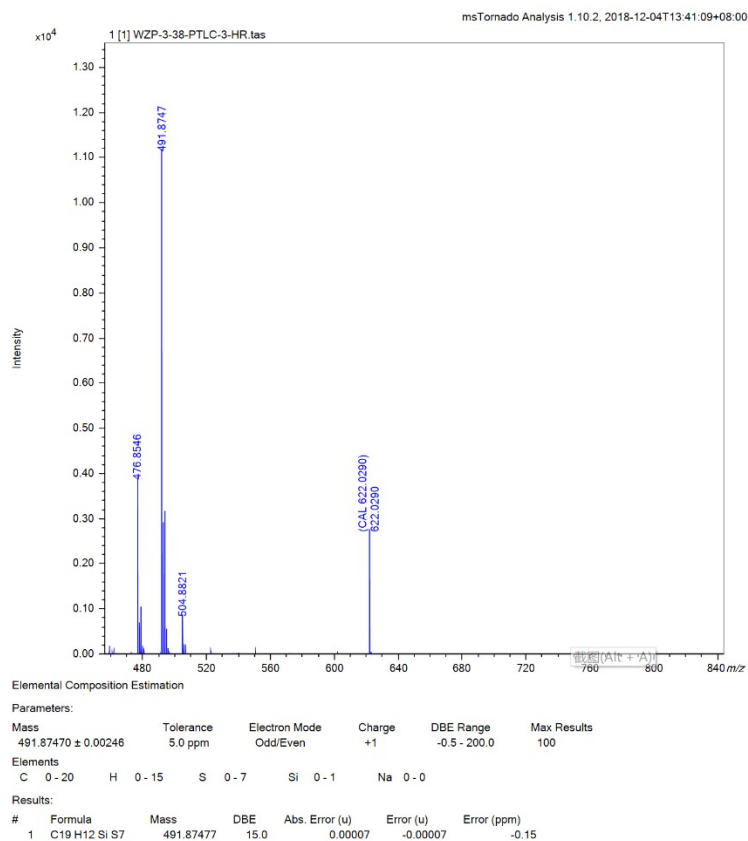

Figure S21. HRMS(MALDI) spectrum of **UHT-1**

## 8. NMR and HRMS Spectra of **UHT-2**

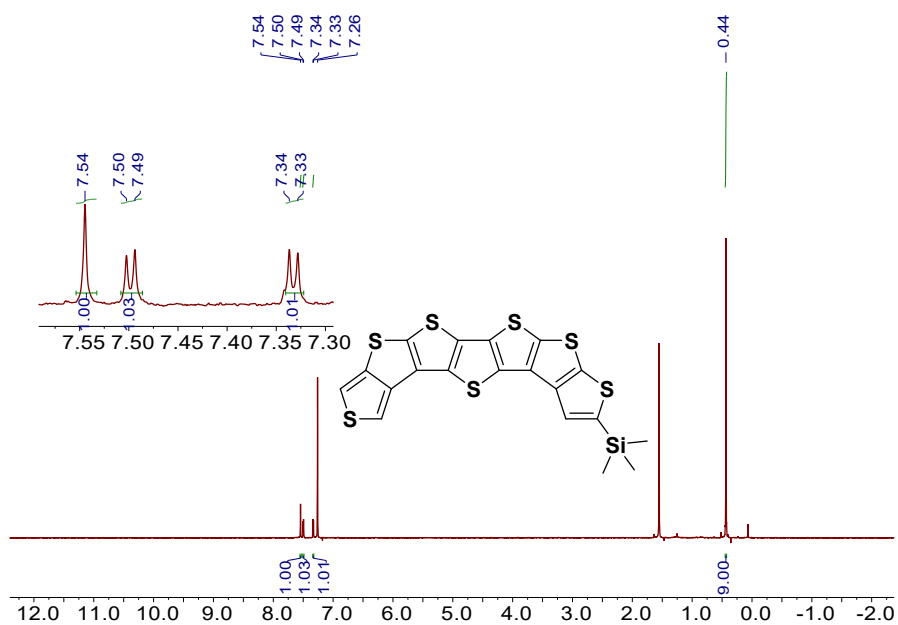

Figure S22. <sup>1</sup>H NMR (300 MHz, CDCl<sub>3</sub>) spectrum of **UHT-2**



## 9. NMR and HRMS Spectra of UHT-3

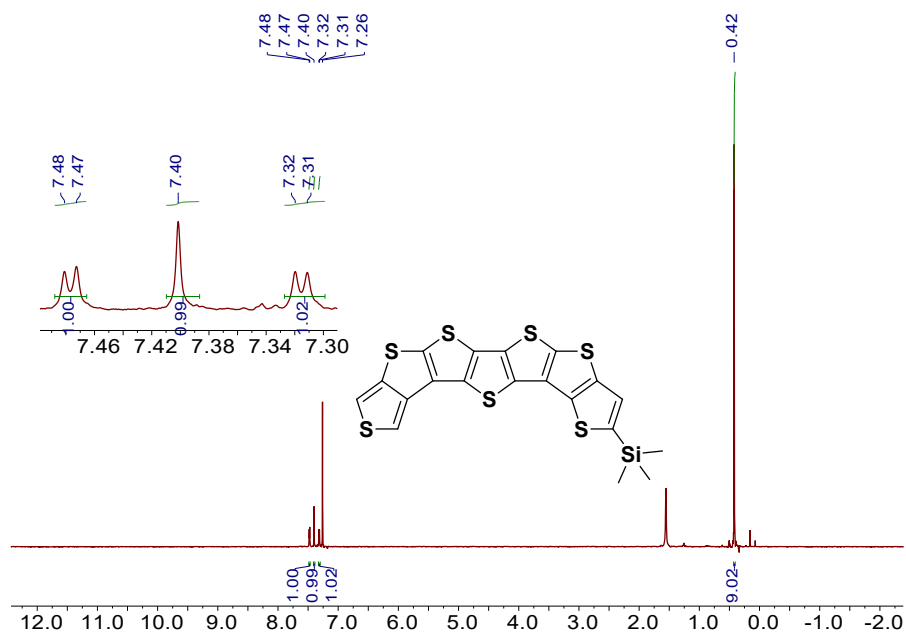

Figure S25.  $^1\text{H}$  NMR (300 MHz,  $\text{CDCl}_3$ ) spectrum of UHT-3

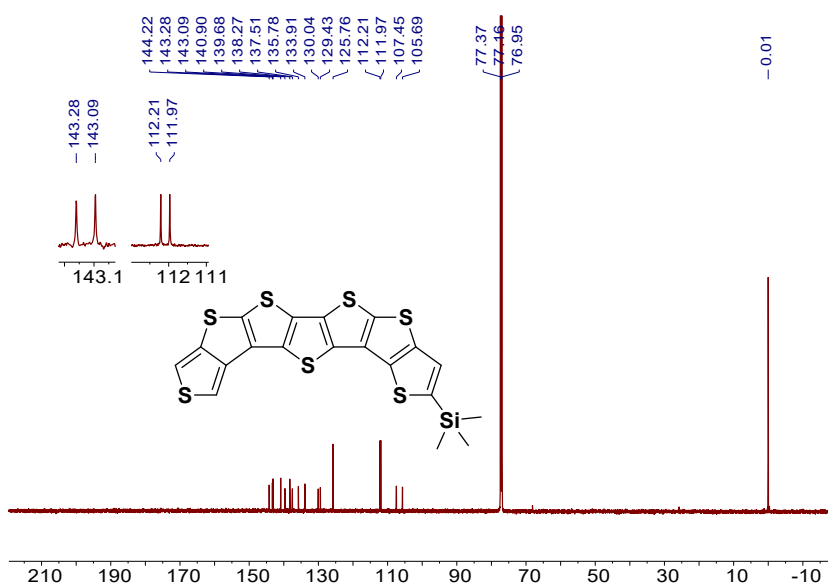

Figure S26.  $^{13}\text{C}$  NMR (150 MHz,  $\text{CDCl}_3$ ) spectrum of UHT-3

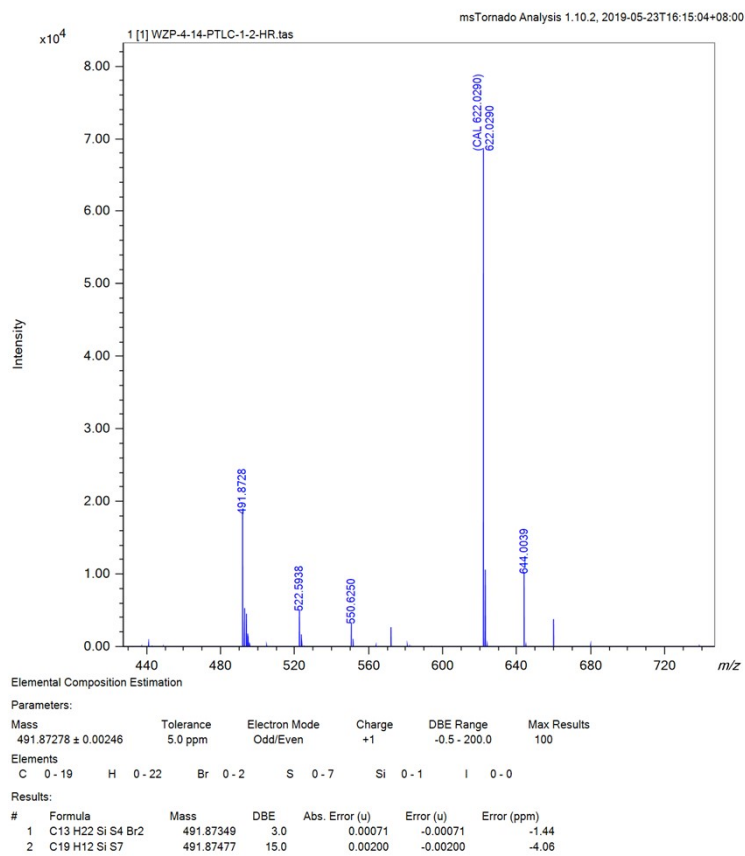

Figure S27. HRMS(MALDI) spectrum of UHT-3

## X-ray crystallographic data of UHT-1, UHT-2 and UHT-3

Table S1. Crystal data and structure refinement for UHT-1, UHT-2 and UHT-3

| Identification code               | UHT-1                                                       | UHT-2                                                      | UHT-3                                                       |
|-----------------------------------|-------------------------------------------------------------|------------------------------------------------------------|-------------------------------------------------------------|
| Empirical formula                 | C <sub>19</sub> H <sub>12</sub> S <sub>7</sub> Si           | C <sub>19</sub> H <sub>12</sub> S <sub>7</sub> Si          | C <sub>19</sub> H <sub>12</sub> S <sub>7</sub> Si           |
| CCDC                              | 2158361                                                     | 2158362                                                    | 2158363                                                     |
| Formula weight                    | 492.80                                                      | 492.80                                                     | 492.80                                                      |
| Temperature                       | 150.01 K                                                    | 150.0 K                                                    | 149.99 K                                                    |
| Wavelength                        | 0.71073 Å                                                   | 0.71073 Å                                                  | 0.71073 Å                                                   |
| Crystal system                    | Monoclinic                                                  | Monoclinic                                                 | orthorhombic                                                |
| Space group                       | P <sub>1</sub> 2 <sub>1</sub> /c <sub>1</sub>               | P <sub>1</sub> 2 <sub>1</sub> /c <sub>1</sub>              | Ima2                                                        |
| Unit cell dimensions              | a = 15.2026 (7) Å<br>b = 10.9247 (5) Å<br>c = 12.3831 (7) Å | a = 20.2064 (6) Å<br>b = 9.8434 (2) Å<br>c = 10.4751 (3) Å | a = 7.0326 (3) Å<br>b = 30.5918 (13) Å<br>c = 10.3680 (4) Å |
| Volume                            | 2042.20 (18) Å <sup>3</sup>                                 | 2034.36 (9) Å <sup>3</sup>                                 | 2030.57 (16) Å <sup>3</sup>                                 |
| Z                                 | 4                                                           | 4                                                          | 4                                                           |
| Density (calculated)              | 1.603 Mg/m <sup>3</sup>                                     | 1.609 Mg/m <sup>3</sup>                                    | 1.467 Mg/m <sup>3</sup>                                     |
| Absorption coefficient            | 0.834 mm <sup>-1</sup>                                      | 0.838 mm <sup>-1</sup>                                     | 0.764 mm <sup>-1</sup>                                      |
| F(000)                            | 1008                                                        | 1008                                                       | 1008                                                        |
| Crystal size                      | 0.24 x 0.2 x 0.04 mm <sup>3</sup>                           | 0.36 x 0.28 x 0.06 mm <sup>3</sup>                         | 0.19 x 0.12 x 0.09 mm <sup>3</sup>                          |
| Theta range for data collection   | 2.301 to 28.306°.                                           | 2.312 to 28.289°.                                          | 5.326 to 52.676°.                                           |
| Index ranges                      | -20 ≤ h ≤ 20, -14 ≤ k ≤ 14,<br>-16 ≤ l ≤ 16                 | -26 ≤ h ≤ 22, -13 ≤ k ≤ 12,<br>-13 ≤ l ≤ 13                | -8 ≤ h ≤ 4, -31 ≤ k ≤ 38,<br>-12 ≤ l ≤ 12                   |
| Reflections collected             | 26055                                                       | 19939                                                      | 5150                                                        |
| Independent reflections           | 5058 [R(int) = 0.0326]                                      | 5026 [R(int) = 0.0479]                                     | 2278 [Rint = 0.0319]                                        |
| Max. and min. transmission        | 0.7457 and 0.6899                                           | 0.7457 and 0.6011                                          | 0.746 and 0.508                                             |
| Data / restraints / parameters    | 5058 / 0 / 247                                              | 5026 / 0 / 247                                             | 2278 / 7 / 162                                              |
| Goodness-of-fit on F <sup>2</sup> | 1.068                                                       | 1.035                                                      | 1.016                                                       |
| Final R indices [I > 2σ(I)]       | R <sub>1</sub> = 0.0322, wR <sub>2</sub> = 0.0821           | R <sub>1</sub> = 0.0370, wR <sub>2</sub> = 0.0880          | R <sub>1</sub> = 0.0235, wR <sub>2</sub> = 0.0618           |
| R indices (all data)              | R <sub>1</sub> = 0.0395, wR <sub>2</sub> = 0.0876           | R <sub>1</sub> = 0.0491, wR <sub>2</sub> = 0.0960          | R <sub>1</sub> = 0.0237, wR <sub>2</sub> = 0.0620           |
| Largest diff. peak and hole       | 0.469 and -0.272 e.Å <sup>-3</sup>                          | 0.588 and -0.360 e.Å <sup>-3</sup>                         | 0.40 and -0.29 e.Å <sup>-3</sup>                            |



## Optimized structures information for UHT-1, UHT-2 and UHT-3

Table S2. Cartesian Coordinates (Å) and Thermal Enieries of Optimized Structure of **UHT-1** in the Ground State ( $S_0$ ) Calculated at the B3LYP /6-31G(d,p) Level of Theory.

| Atomic Type | Coordinates (Angstroms) |           |           |
|-------------|-------------------------|-----------|-----------|
|             | x                       | y         | z         |
| S           | 5.239346                | -0.905621 | 0.001710  |
| S           | 3.105375                | -3.285014 | 0.004551  |
| S           | -0.077896               | -3.534558 | 0.000641  |
| S           | -0.851401               | 0.635891  | -0.005659 |
| S           | -3.815603               | -2.399815 | 0.000039  |
| S           | -6.323025               | -0.427459 | 0.003274  |
| S           | -4.118044               | 3.164134  | -0.000801 |
| Si          | 5.629411                | 2.266337  | 0.001297  |
| C           | 4.541997                | 0.722888  | -0.004176 |
| C           | 3.168816                | 0.656703  | -0.006428 |
| H           | 2.543738                | 1.542984  | -0.011997 |
| C           | 3.664557                | -1.624061 | 0.002714  |
| C           | 2.648349                | -0.675514 | -0.002172 |
| C           | 1.456138                | -2.689311 | -0.000069 |
| C           | 1.351518                | -1.303186 | -0.003083 |
| C           | -0.906265               | -1.985026 | -0.002787 |
| C           | -0.021649               | -0.910945 | -0.004496 |
| C           | -2.264878               | -1.571763 | -0.002479 |
| C           | -2.401669               | -0.187500 | -0.003526 |
| C           | -3.762026               | 0.246949  | -0.001797 |
| C           | -4.625315               | -0.847886 | 0.000133  |
| C           | -4.507078               | 1.467190  | -0.000550 |
| C           | -5.883457               | 1.278835  | 0.002265  |
| C           | -6.638067               | 2.487054  | 0.004238  |
| H           | -7.719350               | 2.546672  | 0.006582  |
| C           | -5.817750               | 3.580500  | 0.002908  |
| H           | -6.104024               | 4.622843  | 0.003870  |
| C           | 4.486491                | 3.763615  | -0.145191 |
| H           | 3.902164                | 3.737670  | -1.070652 |
| H           | 3.787168                | 3.824058  | 0.695178  |
| H           | 5.073630                | 4.688578  | -0.150914 |
| C           | 6.609750                | 2.344409  | 1.615639  |
| H           | 7.259478                | 1.470662  | 1.733604  |
| H           | 7.245634                | 3.236509  | 1.644146  |
| H           | 5.942396                | 2.379650  | 2.482837  |
| C           | 6.818865                | 2.197833  | -1.466147 |
| H           | 6.274637                | 2.156304  | -2.415189 |
| H           | 7.464810                | 3.082835  | -1.487409 |

---

B3LYP/6-31G(d,p)

E = -3808.09551268 hartree

# of imaginary frequencies = 0

<Thermal Energies>

---

|                                              |                             |
|----------------------------------------------|-----------------------------|
| Zero-point correction=                       | 0.251276 (Hartree/Particle) |
| Thermal correction to Energy=                | 0.278129                    |
| Thermal correction to Enthalpy=              | 0.279073                    |
| Thermal correction to Gibbs Free Energy=     | 0.192175                    |
| Sum of electronic and zero-point Energies=   | -3807.844236                |
| Sum of electronic and thermal Energies=      | -3807.817383                |
| Sum of electronic and thermal Enthalpies=    | -3807.816439                |
| Sum of electronic and thermal Free Energies= | -3807.903338                |

---

Table S3. Cartesian Coordinates (Å) and Thermal Energies of Optimized Structure of **UHT-2** in the Ground State ( $S_0$ ) Calculated at the B3LYP /6-31G(d,p) Level of Theory.

---

| Atomic Type | Coordinates (Angstroms) |           |           |
|-------------|-------------------------|-----------|-----------|
|             | x                       | y         | z         |
| S           | 0.816888                | 0.604914  | -0.005649 |
| S           | -0.027445               | -3.552124 | 0.000657  |
| S           | 6.287032                | -0.567364 | 0.002889  |
| S           | -5.300022               | -0.834715 | 0.001913  |
| S           | 3.733384                | -2.469350 | -0.000024 |
| S           | -3.206382               | -3.249563 | 0.004790  |
| S           | 5.623065                | 3.700148  | 0.001957  |
| Si          | -5.636329               | 2.343468  | 0.001129  |
| C           | -1.419296               | -1.297420 | -0.003043 |
| C           | 0.826950                | -2.016848 | -0.002793 |
| C           | 2.192236                | -1.625984 | -0.002454 |
| C           | -2.705474               | -0.648164 | -0.002039 |
| C           | 2.353428                | -0.243587 | -0.003494 |
| C           | -3.203574               | 0.692504  | -0.006439 |
| H           | -2.563711               | 1.568214  | -0.012179 |
| C           | 3.718473                | 0.169043  | -0.001951 |
| C           | -0.039826               | -0.928346 | -0.004500 |
| C           | -4.575499               | 0.781828  | -0.004214 |
| C           | 5.886442                | 1.164311  | 0.002064  |
| C           | 4.172401                | 2.750714  | -0.001033 |
| H           | 3.208037                | 3.237839  | -0.002748 |
| C           | 4.462290                | 1.409008  | -0.000696 |
| C           | -1.547308               | -2.681608 | -0.000012 |
| C           | 4.561022                | -0.930402 | -0.000106 |
| C           | 6.648276                | 2.296928  | 0.003744  |
| H           | 7.722752                | 2.404945  | 0.005975  |

---

|   |           |           |           |
|---|-----------|-----------|-----------|
| C | -3.737495 | -1.579519 | 0.002966  |
| C | -4.467318 | 3.821116  | -0.140670 |
| H | -3.770104 | 3.869307  | 0.702261  |
| H | -3.880345 | 3.785516  | -1.064155 |
| H | -5.038602 | 4.755927  | -0.148149 |
| C | -6.618703 | 2.436774  | 1.613412  |
| H | -7.238161 | 3.340358  | 1.641854  |
| H | -7.284702 | 1.574974  | 1.728410  |
| H | -5.952894 | 2.458378  | 2.482242  |
| C | -6.823415 | 2.298401  | -1.469112 |
| H | -6.277890 | 2.248745  | -2.417014 |
| H | -7.488129 | 1.428962  | -1.424213 |
| H | -7.453638 | 3.194663  | -1.490396 |

B3LYP/6-31G(d,p)

E = -3808.09201832 hartree

# of imaginary frequencies = 0

<Thermal Energies>

|                                              |                             |
|----------------------------------------------|-----------------------------|
| Zero-point correction=                       | 0.251087 (Hartree/Particle) |
| Thermal correction to Energy=                | 0.277908                    |
| Thermal correction to Enthalpy=              | 0.278852                    |
| Thermal correction to Gibbs Free Energy=     | 0.191808                    |
| Sum of electronic and zero-point Energies=   | -3807.840932                |
| Sum of electronic and thermal Energies=      | -3807.814111                |
| Sum of electronic and thermal Enthalpies=    | -3807.813166                |
| Sum of electronic and thermal Free Energies= | -3807.900211                |

Table S4. Cartesian Coordinates (Å) and Thermal Energies of Optimized Structure of **UHT-3** in the Ground State ( $S_0$ ) Calculated at the B3LYP /6-31G(d,p) Level of Theory.

| Atomic Type | Coordinates (Angstroms) |          |           |
|-------------|-------------------------|----------|-----------|
|             | x                       | y        | z         |
| C           | 6.193997                | 2.899319 | -1.542585 |
| H           | 5.246285                | 3.447176 | -1.577437 |
| H           | 6.263289                | 2.300052 | -2.456174 |
| H           | 7.003870                | 3.637363 | -1.562021 |
| C           | 6.199681                | 2.892507 | 1.547861  |
| H           | 5.251725                | 3.439486 | 1.589058  |
| H           | 6.273172                | 2.289230 | 2.458484  |
| H           | 7.009135                | 3.631013 | 1.567223  |
| H           | 8.782463                | 1.522188 | -0.004416 |
| H           | 8.019625                | 0.197339 | 0.879305  |
| H           | 8.016906                | 0.201972 | -0.892829 |
| C           | -6.771602               | 2.260662 | -0.000085 |
| H           | -7.847753               | 2.350570 | -0.000134 |

|    |           |           |           |
|----|-----------|-----------|-----------|
| C  | -5.990760 | 1.141088  | -0.000052 |
| C  | -4.570975 | 1.409777  | 0.000014  |
| C  | -4.303597 | 2.756122  | 0.000028  |
| H  | -3.347538 | 3.259427  | 0.000064  |
| C  | -4.630204 | -0.931064 | 0.000014  |
| C  | -3.806440 | 0.182478  | 0.000052  |
| C  | -2.434561 | -0.206943 | 0.000091  |
| C  | -2.250263 | -1.586692 | 0.000080  |
| C  | -0.878687 | -1.953446 | 0.000064  |
| C  | -0.032148 | -0.849640 | 0.000064  |
| C  | 1.352780  | -1.197492 | 0.000050  |
| C  | 1.509140  | -2.583254 | 0.000021  |
| C  | 2.628230  | -0.551972 | 0.000019  |
| C  | 3.698833  | -1.437332 | -0.000068 |
| C  | 4.972726  | -0.806450 | -0.000214 |
| H  | 5.915647  | -1.340634 | -0.000374 |
| C  | 4.890659  | 0.569261  | -0.000252 |
| C  | 7.927923  | 0.836507  | -0.004962 |
| S  | -5.770053 | 3.680926  | -0.000052 |
| S  | -6.362023 | -0.597202 | -0.000063 |
| S  | -3.776926 | -2.456054 | 0.000044  |
| S  | -0.913862 | 0.668526  | 0.000128  |
| S  | 0.002498  | -3.474742 | 0.000102  |
| S  | 3.173247  | -3.121462 | -0.000141 |
| S  | 3.199691  | 1.088895  | -0.000145 |
| Si | 6.310260  | 1.813000  | 0.000032  |

---

B3LYP/6-31G(d,p)

E = -3808.09542180 hartree

# of imaginary frequencies = 0

<Thermal Energies>

---

|                                              |                             |
|----------------------------------------------|-----------------------------|
| Zero-point correction=                       | 0.251118 (Hartree/Particle) |
| Thermal correction to Energy=                | 0.277910                    |
| Thermal correction to Enthalpy=              | 0.278854                    |
| Thermal correction to Gibbs Free Energy=     | 0.191987                    |
| Sum of electronic and zero-point Energies=   | -3807.844303                |
| Sum of electronic and thermal Energies=      | -3807.817512                |
| Sum of electronic and thermal Enthalpies=    | -3807.816568                |
| Sum of electronic and thermal Free Energies= | -3807.903435                |

---
